# Supplementary material for: Examining TROPOMI formaldehyde to nitrogen dioxide ratios in the Lake Michigan region: implications for ozone exceedances
Source: Copernicus journal article supplement (doi:10.5194/acp-23-7867-2023), 2023-07-17
Supplement: Supplementary file 1 [file acp-23-7867-2023-supplement.pdf]

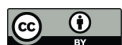

*Supplement of*

## **Examining TROPOMI formaldehyde to nitrogen dioxide ratios in the Lake Michigan region: implications for ozone exceedances**

**Juanito Jerrold Mariano Acdan et al.**

*Correspondence to:* Juanito Jerrold Mariano Acdan (acdan@wisc.edu)

The copyright of individual parts of the supplement might differ from the article licence.

**Table S1.** Dates of 2019, 2020, and 2021 ozone (O<sub>3</sub>) exceedance days in the Chicago-Naperville-Elgin, Illinois-Indiana-Wisconsin, core-based statistical area (hereafter the Chicago metropolitan area, or “CMA” for short). An O<sub>3</sub> exceedance day is defined as having at least one ground monitor in the U.S. EPA Air Quality System (AQS) measuring a maximum daily 8-hour average (MDA8) O<sub>3</sub> value greater than 70 parts per billion (ppb). The “# stations” column indicates how many monitors in the CMA measured an exceedance.

| 2019                           |            |             | 2020                           |            |             | 2021                           |            |             |
|--------------------------------|------------|-------------|--------------------------------|------------|-------------|--------------------------------|------------|-------------|
| Dates                          | # stations | Day of week | Dates                          | # stations | Day of week | Dates                          | # stations | Day of week |
| 5-Jun                          | 4          | Wed         | 4-Jun                          | 5          | Thu         | 22-May                         | 1          | Sat         |
| 26-Jun                         | 1          | Wed         | 5-Jun                          | 10         | Fri         | 3-Jun                          | 14         | Thu         |
| 28-Jun                         | 1          | Fri         | 8-Jun                          | 3          | Mon         | 4-Jun                          | 5          | Fri         |
| 29-Jun                         | 6          | Sat         | 16-Jun                         | 2          | Tue         | 11-Jun                         | 5          | Fri         |
| 1-Jul                          | 1          | Mon         | 17-Jun                         | 15         | Wed         | 17-Jun                         | 5          | Thu         |
| 3-Jul                          | 3          | Wed         | 18-Jun                         | 20         | Thu         | 18-Jun                         | 8          | Fri         |
| 5-Jul                          | 1          | Fri         | 19-Jun                         | 16         | Fri         | 20-Jul                         | 5          | Tue         |
| 8-Jul                          | 1          | Mon         | 27-Jun                         | 2          | Sat         | 22-Jul                         | 6          | Thu         |
| 9-Jul                          | 12         | Tue         | 1-Jul                          | 4          | Wed         | 23-Jul                         | 4          | Fri         |
| 13-Jul                         | 1          | Sat         | 2-Jul                          | 1          | Thu         | 26-Jul                         | 2          | Mon         |
| 25-Jul                         | 2          | Thu         | 3-Jul                          | 14         | Fri         | 27-Jul                         | 1          | Tue         |
| 2-Aug                          | 2          | Fri         | 6-Jul                          | 14         | Mon         | 28-Jul                         | 5          | Wed         |
| 3-Aug                          | 3          | Sat         | 7-Jul                          | 6          | Tue         | 4-Aug                          | 3          | Wed         |
| <b>Total: 13 days</b>          |            |             | 8-Jul                          | 3          | Wed         | 7-Aug                          | 2          | Sat         |
| <b>10 weekdays, 3 weekends</b> |            |             | 9-Jul                          | 4          | Thu         | 23-Aug                         | 1          | Mon         |
|                                |            |             | 17-Jul                         | 2          | Fri         | 25-Aug                         | 6          | Wed         |
|                                |            |             | 25-Jul                         | 5          | Sat         | 26-Aug                         | 4          | Thu         |
|                                |            |             | 7-Aug                          | 1          | Fri         | 27-Aug                         | 4          | Fri         |
|                                |            |             | 15-Aug                         | 4          | Sat         | 13-Sep                         | 1          | Mon         |
|                                |            |             | 21-Aug                         | 3          | Fri         | 1-Oct                          | 3          | Fri         |
|                                |            |             | <b>Total: 20 days</b>          |            |             | <b>Total: 20 days</b>          |            |             |
|                                |            |             | <b>17 weekdays, 3 weekends</b> |            |             | <b>18 weekdays, 2 weekends</b> |            |             |

**Table S2.** Distribution of the number of CMA O<sub>3</sub> exceedance days by year and day of week. The last two columns report the percentage of exceedances that occurred on weekdays and weekends for each row’s time period.

| CMA ozone exceedance day of week distribution |        |         |           |          |        |          |        |          |          |          |
|-----------------------------------------------|--------|---------|-----------|----------|--------|----------|--------|----------|----------|----------|
| Year(s)                                       | Monday | Tuesday | Wednesday | Thursday | Friday | Saturday | Sunday | All days | Weekdays | Weekends |
| 2019                                          | 2      | 1       | 3         | 1        | 3      | 3        | 0      | 13       | 77 %     | 23 %     |
| 2020                                          | 2      | 2       | 3         | 4        | 6      | 3        | 0      | 20       | 85 %     | 15 %     |
| 2021                                          | 3      | 2       | 3         | 4        | 6      | 2        | 0      | 20       | 90 %     | 10 %     |
| All years                                     | 7      | 5       | 9         | 9        | 15     | 8        | 0      | 53       | 85 %     | 15 %     |

**Table S3.** Kolmogorov-Smirnov (K-S) test results for comparison of the TROPOMI ozone season and CMA exceedance day composites. For each variable, 1000 K-S tests were performed using a random subsampling approach at the 98 % confidence level. In the “median p-value” column, values <0.001 are represented as 0, and bolded values indicate overall statistically significant results (median p-value <0.020). The “wind divergence – tails” variable refers to only subsampling values greater or less than one standard deviation from the mean wind divergence value. \*Sig. diff. = significant difference.

| <b>2-subsample K-S test results: ozone season vs. CMA exceedance days</b> |                                               |                       |                         |                       |
|---------------------------------------------------------------------------|-----------------------------------------------|-----------------------|-------------------------|-----------------------|
| <b>Variable</b>                                                           | <b>Percentage of tests with a *sig. diff.</b> | <b>Median p-value</b> | <b>Full sample size</b> | <b>Subsample size</b> |
| HCHO bias corrected                                                       | 100 %                                         | <b>0.000</b>          | 1146                    | 286                   |
| NO <sub>2</sub>                                                           | 100 %                                         | <b>0.000</b>          | 1146                    | 286                   |
| FNR bias corrected                                                        | 100 %                                         | <b>0.000</b>          | 1146                    | 286                   |
| Wind divergence                                                           | 1.8 %                                         | 0.117                 | 880                     | 220                   |
| Wind divergence – tails                                                   | 97.1 %                                        | <b>0.001</b>          | 241                     | 60                    |
| 2-m temperature                                                           | 100 %                                         | <b>0.000</b>          | 1242                    | 310                   |

**Table S4.** Kolmogorov-Smirnov (K-S) test results for comparison of the weekday and weekend composites. For each variable, 1000 K-S tests were performed using a random subsampling approach at the 98 % confidence level. In the “median p-value” column, values <0.001 are represented as 0, and bolded values indicate overall statistically significant results (median p-value <0.020). The “wind divergence – tails” variable refers to only subsampling values greater or less than one standard deviation from the mean wind divergence value. \*Sig. diff. = significant difference.

| <b>2-subsample K-S test results: weekdays vs. weekends</b> |                                               |                       |                         |                       |
|------------------------------------------------------------|-----------------------------------------------|-----------------------|-------------------------|-----------------------|
| <b>Variable</b>                                            | <b>Percentage of tests with a *sig. diff.</b> | <b>Median p-value</b> | <b>Full sample size</b> | <b>Subsample size</b> |
| HCHO bias corrected                                        | 100 %                                         | <b>0.000</b>          | 1146                    | 286                   |
| NO <sub>2</sub>                                            | 71.9 %                                        | <b>0.013</b>          | 1146                    | 286                   |
| FNR bias corrected                                         | 100 %                                         | <b>0.000</b>          | 1146                    | 286                   |
| Wind divergence                                            | 0 %                                           | 0.607                 | 880                     | 220                   |
| Wind divergence – tails                                    | 0 %                                           | 0.821                 | 241                     | 60                    |
| 2-m temperature                                            | 65.5 %                                        | 0.023                 | 1242                    | 310                   |

**Table S5.** Comparison of U.S. EPA Air Quality System (AQS) 2019–2021 mean surface NO<sub>2</sub> measurements at 13:00 local time during the ozone season (OS) and during CMA ozone exceedance days (Ex). Both AQS surface measurements and TROPOMI column observations (**Fig. 3c** in the main text) indicate an average percent increase in NO<sub>2</sub> levels of approximately 20 % on exceedance days relative to all days across the ozone season. \*Site identifiers take the form of “X (a\_b\_c)” where X is the letter indicating the location of the AQS surface monitor in **Fig. S1** below, and a = state code, b = county code, and c = site number in the AQS system. These sites were chosen for analysis because they had data during the entire 2019–2021 study period. AQS data used in this analysis were downloaded from <https://www.epa.gov/outdoor-air-quality-data>.

| <b>AQS surface NO<sub>2</sub>: ozone season vs. CMA exceedance days</b> |                                     |                                        |                                     |                            |
|-------------------------------------------------------------------------|-------------------------------------|----------------------------------------|-------------------------------------|----------------------------|
| <b>Site*</b>                                                            | <b>Ozone season mean (OS) [ppb]</b> | <b>Exceedance days mean (Ex) [ppb]</b> | <b>Ex – OS [ppb]</b>                | <b>Ex % change from OS</b> |
| A (17_31_119)                                                           | 13.01                               | 17.69                                  | +4.68                               | +36 %                      |
| B (17_31_219)                                                           | 8.94                                | 10.21                                  | +1.27                               | +14 %                      |
| C (17_31_3103)                                                          | 10.77                               | 13.16                                  | +2.39                               | +22 %                      |
| D (17_31_4002)                                                          | 6.65                                | 7.20                                   | +0.55                               | +8 %                       |
| E (17_31_76)                                                            | 5.65                                | 5.98                                   | +0.33                               | +6 %                       |
| F (18_141_15)                                                           | 2.17                                | 1.45                                   | -0.72                               | -33 %                      |
| G (18_89_22)                                                            | 2.71                                | 2.76                                   | +0.05                               | +2 %                       |
| H (55_79_56)                                                            | 7.69                                | 9.04                                   | +1.35                               | +18 %                      |
| <b>All sites</b>                                                        | <b>7.27</b>                         | <b>8.62</b>                            | <b>+1.35</b>                        | <b>+19 %</b>               |
| <b>TROPOMI composite – full domain</b>                                  | <b>1.75 molec. cm<sup>-2</sup></b>  | <b>2.11 molec. cm<sup>-2</sup></b>     | <b>+0.36 molec. cm<sup>-2</sup></b> | <b>+21 %</b>               |

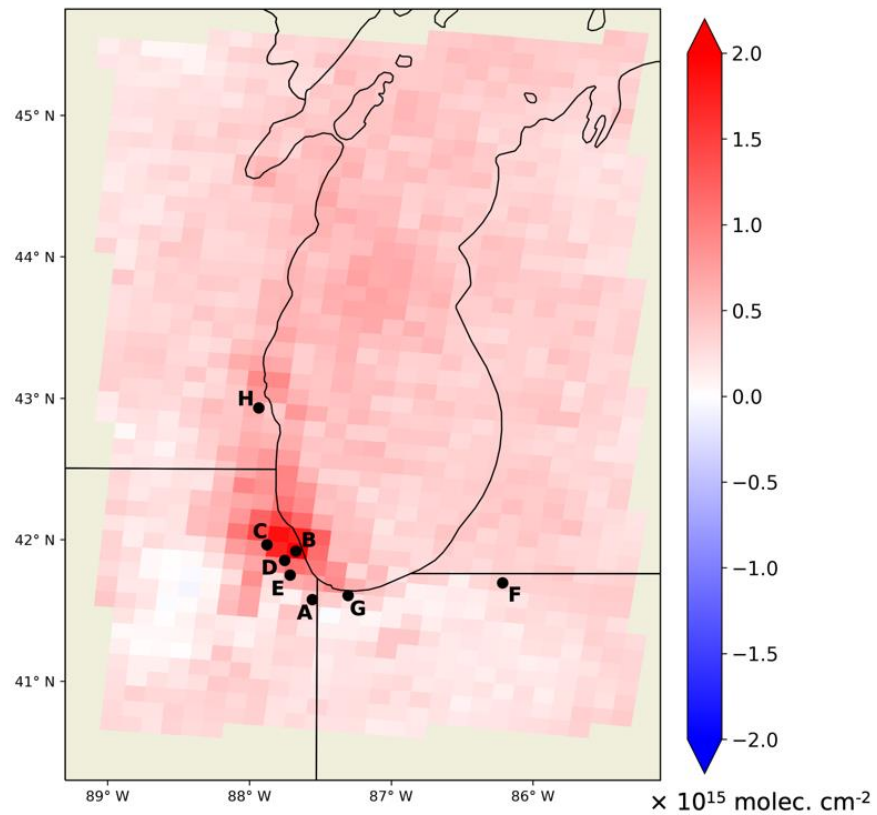

**Figure S1.** Difference between the OS and Ex TROPOMI NO<sub>2</sub> composites (Ex - OS) with the locations of the AQS surface monitors from **Table S5** denoted by black circles.

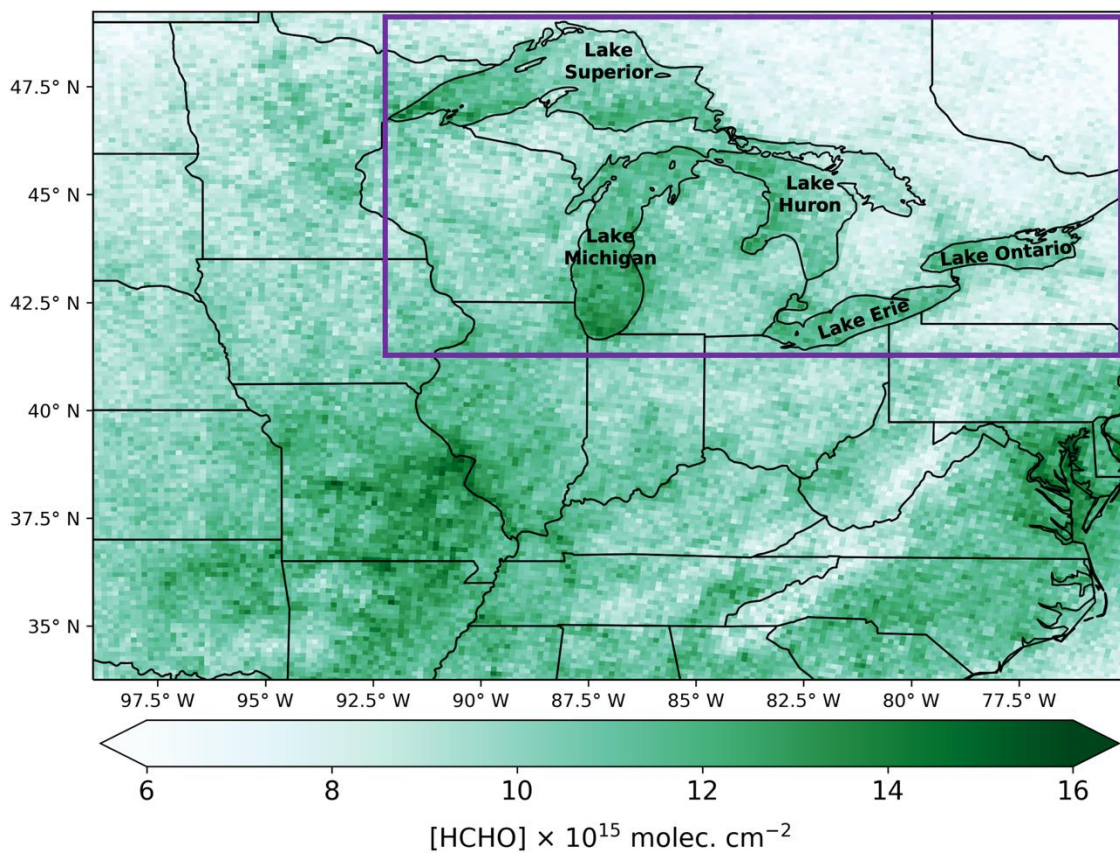

**Figure S2.** TROPOMI-derived composite of 2019–2021 mean tropospheric HCHO vertical column densities (VCDs) in the Lake Michigan region during CMA ozone exceedance days. As seen in the purple box, higher HCHO VCDs are seen over the surfaces of the Great Lakes compared to the surrounding land areas.

TROPOMI composite HCHO values (2019–2021 mean)

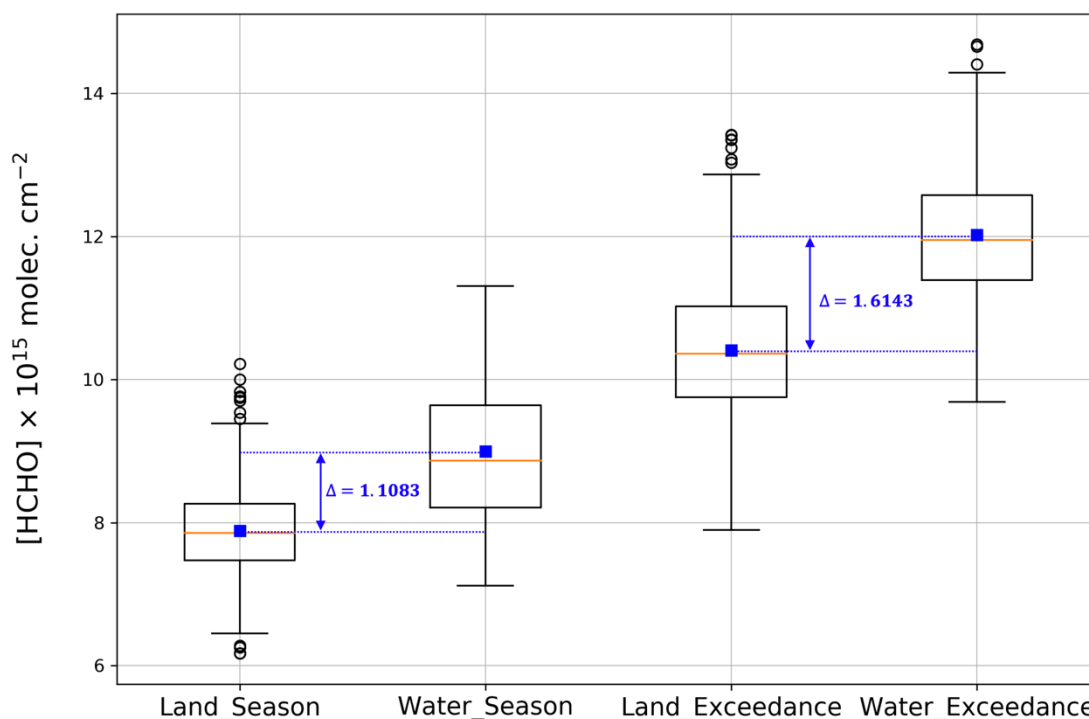

**Figure S3.** Boxplot distributions of TROPOMI HCHO vertical column densities (VCDs) for the O<sub>3</sub> season and CMA exceedance day composites separated by over land and over water values. The median of each distribution is represented by an orange horizontal line, the mean is denoted by a blue square, and outliers are represented by circles outline in black. The difference in means between the over land and over water values ( $\Delta$ ) is the “absolute over water bias” value in **Table S6** below.

**Table S6.** HCHO absolute and relative over water bias values for the O<sub>3</sub> season and CMA exceedance day composites. The absolute over water bias value is calculated by subtracting the mean HCHO over land value from the mean HCHO over water value. The relative over water bias value is calculated as  $\left(\frac{HCHO_{water\_mean} - HCHO_{land\_mean}}{HCHO_{land\_mean}}\right) \times 100\%$ .

| Composite category  | Absolute over water bias                        | Relative over water bias |
|---------------------|-------------------------------------------------|--------------------------|
| Ozone season        | $1.1083 \times 10^{15}$ molec. cm <sup>-2</sup> | +14.05 %                 |
| CMA exceedance days | $1.6143 \times 10^{15}$ molec. cm <sup>-2</sup> | +15.51 %                 |

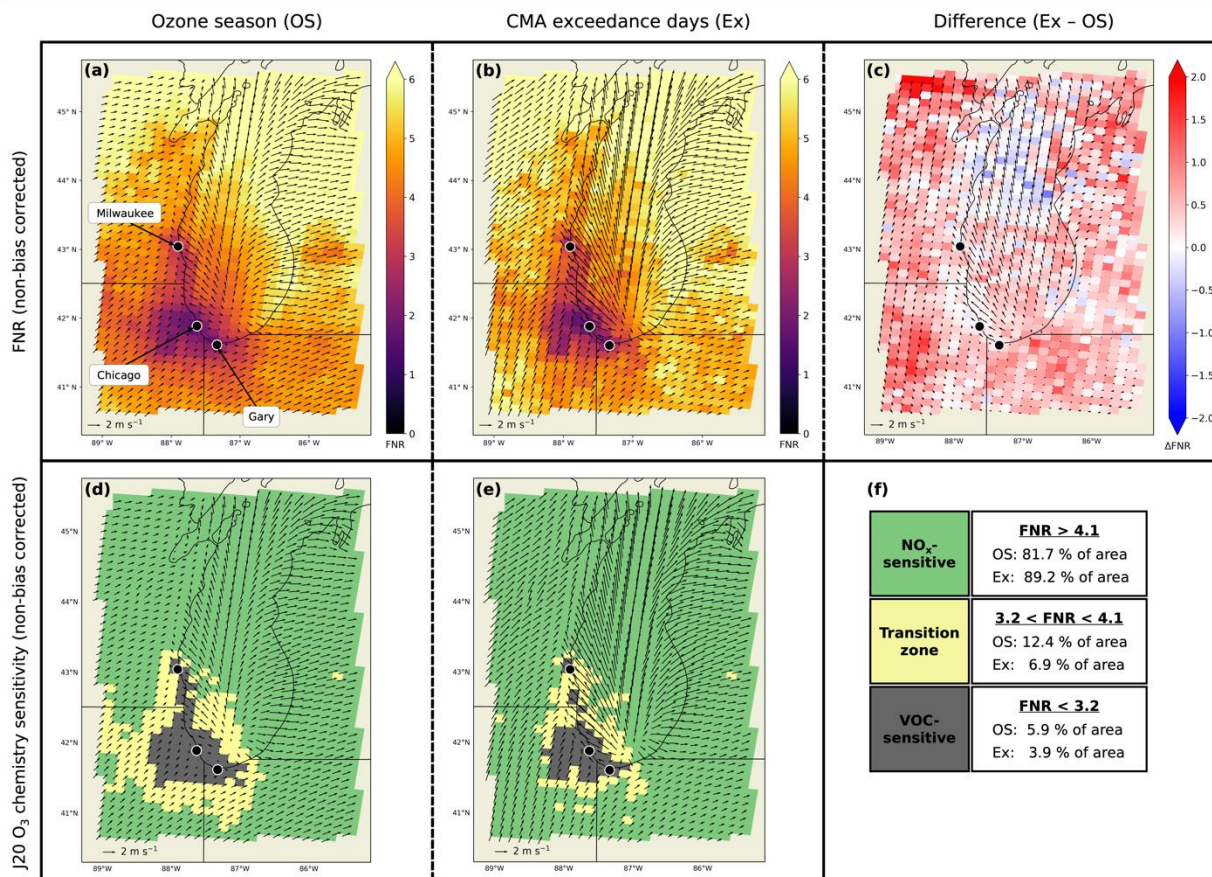

**Figure S4.** TROPOMI-derived 2019–2021 FNR values calculated using non-bias corrected HCHO values in the Lake Michigan region during: (a) the ozone season (OS), (b) CMA exceedance days (Ex), and (c) the difference between them (Ex – OS). Jin et al. (2020; “J20”)\* threshold interpretation of 2019–2021 ozone chemistry sensitivity using non-bias corrected FNR values during: (d) the ozone season, (e) CMA exceedance days, and (f) the percent of the domain area classified as each J20 sensitivity regime. Mean 10-meter winds are represented by arrows.

\*Jin, X., Fiore, A. M., Boersma, K. F., De Smedt, I., and Valin, L.: Inferring changes in summertime surface ozone–NO<sub>x</sub>–VOC chemistry over U.S. urban areas from two decades of satellite and ground-based observations, *Environ. Sci. Tech.*, 54(11), 6518–6529, <https://doi.org/10.1021/acs.est.9b07785>, 2020.



TROPOMI composite NO<sub>2</sub> values by month (2019–2021 mean)

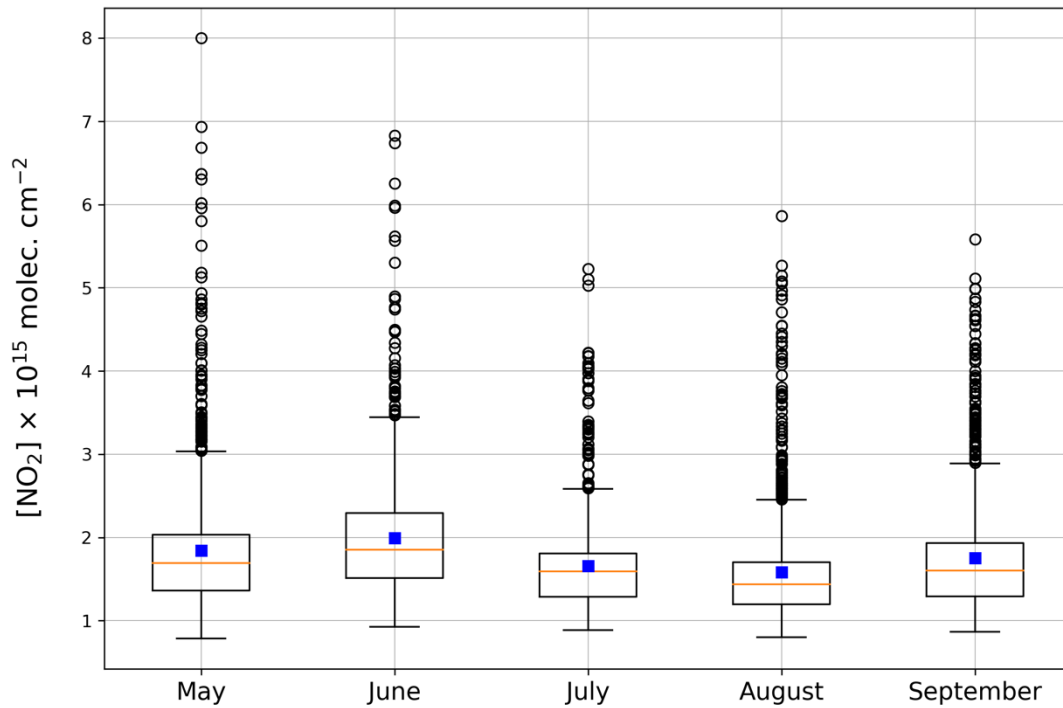

**Figure S5.** Boxplot distributions of 2019–2021 mean TROPOMI NO<sub>2</sub> composite values for each month of the ozone season. Means of the distributions are denoted by a blue square, medians are denoted by an orange horizontal line, and outliers are denoted by circles outlined in black. The outlier values mostly represent grid boxes in the Chicago metropolitan area where NO<sub>2</sub> VCDs are much higher than the rest of the study domain. NO<sub>2</sub> VCDs do not appear to exhibit a strong intra-seasonal cycle during the ozone season in the Lake Michigan region.

TROPOMI composite HCHO\_biasCorr values by month (2019–2021 mean)

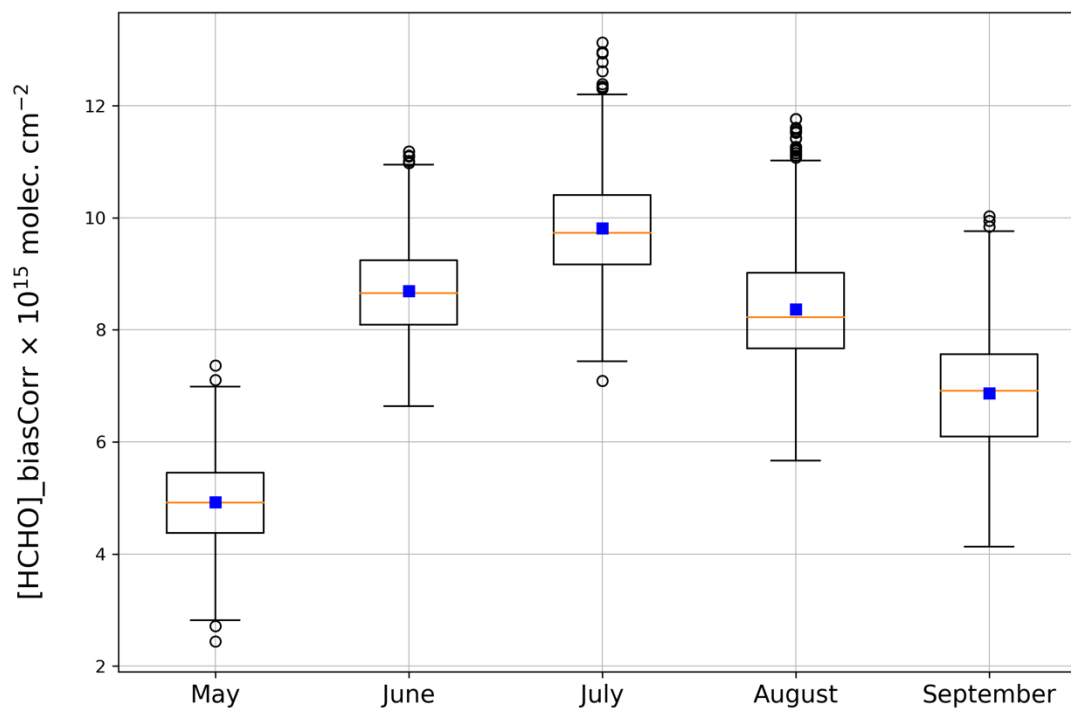

**Figure S6.** Boxplot distributions of 2019–2021 mean TROPOMI bias corrected HCHO composite values for each month of the ozone season. Means of the distributions are denoted by a blue square, medians are denoted by an orange horizontal line, and outliers are denoted by circles outlined in black. Both HCHO VCDs and 2-meter air temperatures (**Fig. S7** below) in the Lake Michigan region exhibit a strong intra-seasonal cycle during the ozone season.

NAM 2-meter air temperature by month (2019–2021 mean)

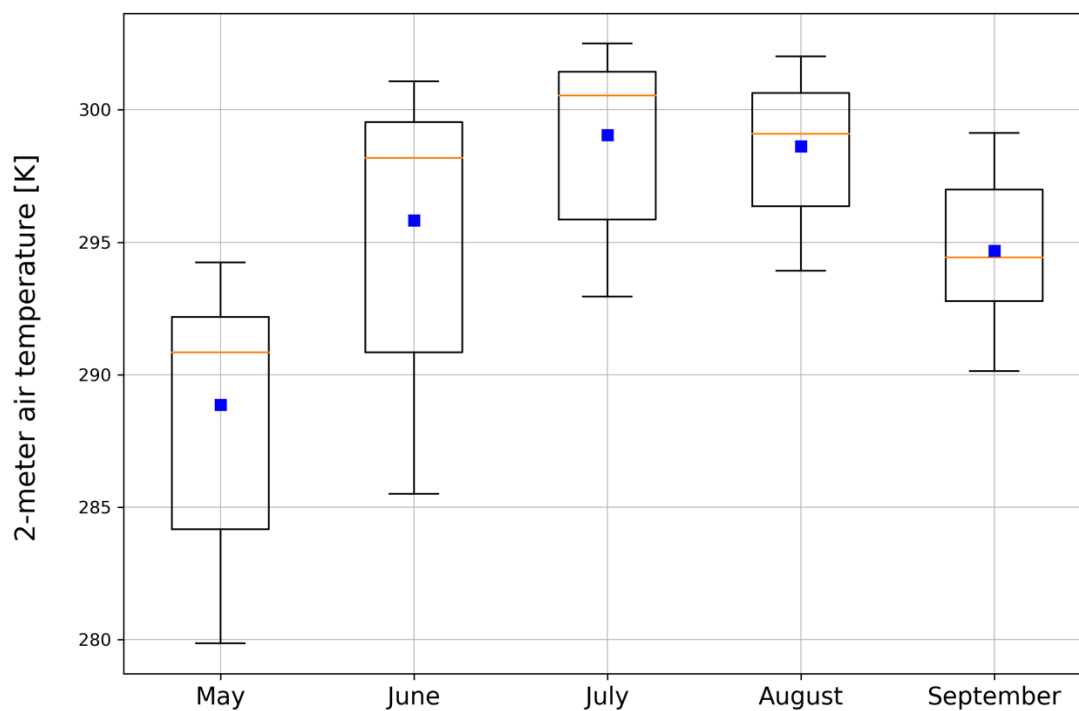

**Figure S7.** Boxplot distributions of 2019–2021 mean North American Mesoscale (NAM) analysis 2-meter air temperature composite values for each month of the ozone season. Means of the distributions are denoted by a blue square and medians are denoted by an orange horizontal line. Both 2-meter air temperatures and HCHO VCDs (**Fig. S6** above) in the Lake Michigan region exhibit a strong intra-seasonal cycle during the ozone season.

**Table S7.** Approximations of how much the mean difference between the ozone season and CMA exceedance day composites for NO<sub>2</sub> (Fig. 3c), HCHO (Fig. 5c), and 2-meter air temperature (Fig. 2f) are due to monthly differences during the ozone season (intra-seasonal changes) versus environmental differences during ozone exceedance days (episodic events). The approximation methodology is explained in detail below the table.

|                                                                                                                                                                                                                          | NO <sub>2</sub> [ $\times 10^{15}$ molec. cm <sup>-2</sup> ] | HCHO [ $\times 10^{15}$ molec. cm <sup>-2</sup> ] | Temperature [K]    |
|--------------------------------------------------------------------------------------------------------------------------------------------------------------------------------------------------------------------------|--------------------------------------------------------------|---------------------------------------------------|--------------------|
| (a) June–August mean                                                                                                                                                                                                     | 1.747 (Fig. S5)                                              | 8.96 (Fig. S6)                                    | 297.83 (Fig. S7)   |
| (b) May–September mean                                                                                                                                                                                                   | 1.766 (Fig. S5)                                              | 7.73 (Fig. S6)                                    | 295.41 (Fig. S7)   |
| (c) Difference [a – b]                                                                                                                                                                                                   | -0.02                                                        | 1.22                                              | 2.42               |
| (d) Mean difference between OS and Ex composites [Ex – OS]                                                                                                                                                               | 0.37 (Fig. 3c)                                               | 2.52 (Fig. 5c)                                    | 4.31 (Fig. 2f)     |
|                                                                                                                                                                                                                          | <b>NO<sub>2</sub></b>                                        | <b>HCHO</b>                                       | <b>Temperature</b> |
| (e) Percent of (d) due to monthly differences during the ozone season (intra-seasonal changes) approximated as:<br><br>$[(e) = \frac{c}{d} \times 100 \%$ if (e) < 0 %, report as 0 %<br>if (e) > 100 %, report as 100 % | 0 %                                                          | 48 %                                              | 56 %               |
| (f) Percent of (d) due to exceedance day differences (episodic events) approximated as:<br><br>$[(f) = 100 \% - (e)]$                                                                                                    | 100 %                                                        | 52 %                                              | 44 %               |

**Methodology description:** Because 94 % of CMA ozone exceedance days occur in June, July, and August (Table S1), it is possible that the differences we see between the ozone season and CMA exceedance day composites are due to intra-seasonal changes. More specifically, the inclusion of May and September data in the ozone season composite may be the cause behind the composite differences because the data used in the CMA exceedance day composites mostly comes from June–August TROPOMI observations. To approximate the effect of intra-seasonal changes, we created boxplot distributions by month for TROPOMI NO<sub>2</sub> and HCHO composite values and NAM temperature composite values. Then we compared the June–August mean values (when most exceedances occur) to the May–September mean values (entire ozone season). We estimate that the difference between the June–August mean and the May–September mean is the amount of change we expect to see in our difference composites (Figs. 2f, 3c, and 5c in the main manuscript) due to intra-seasonal changes. Finally, we compared this difference to the mean difference we see in the main text difference composites (Figs. 2f, 3c, and 5c). Dividing these two values gives us an estimate of how much (%) of the change shown in our main text figures are due to intra-seasonal differences, while the remaining amount of difference we prescribe as due to changes in environmental conditions on exceedance days (episodic events).

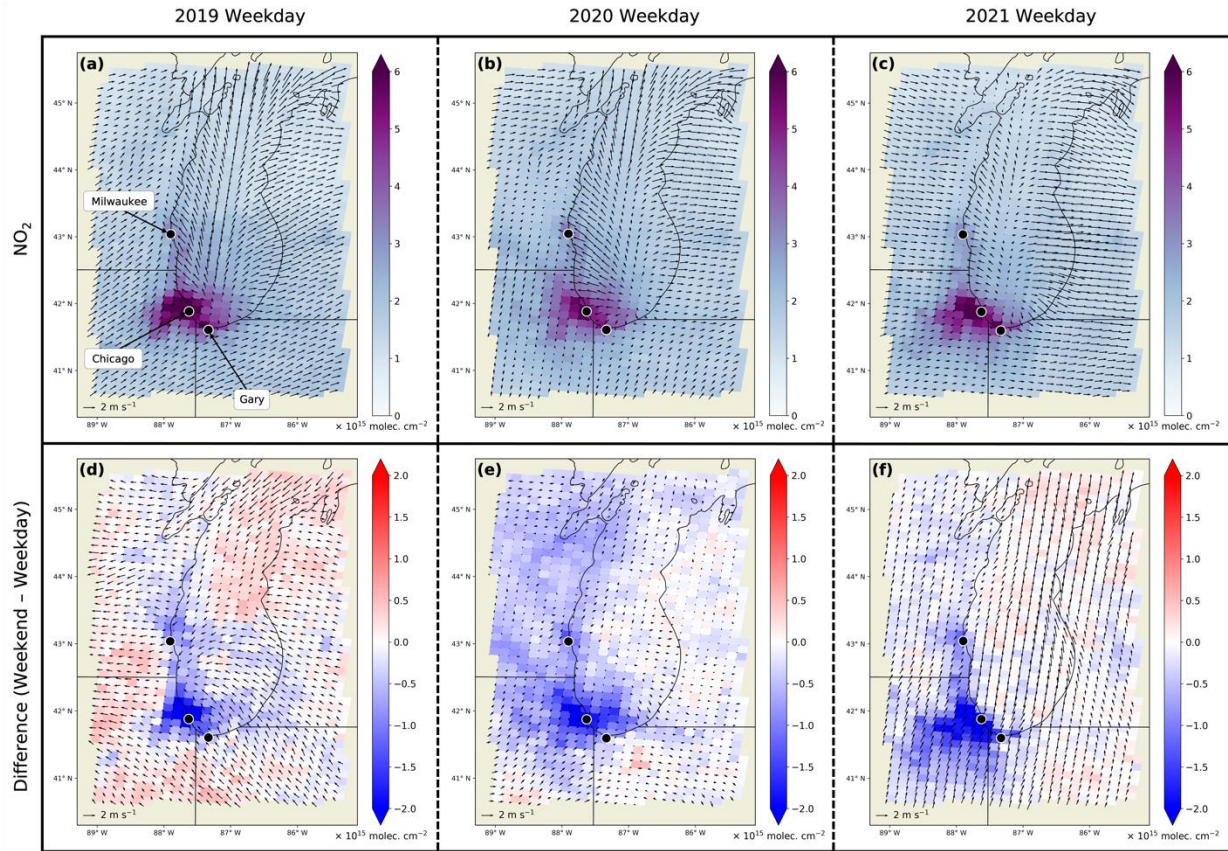

**Figure S8.** TROPOMI-derived composites of mean weekday tropospheric NO<sub>2</sub> VCDs in the Lake Michigan region during: (a) 2019, (b) 2020, and (c) 2021. The difference between weekday and weekend tropospheric NO<sub>2</sub> VCDs in the Lake Michigan region during: (d) 2019, (e) 2020, and (f) 2021. Mean 10-meter winds are represented by arrows.

TROPOMI composite HCHO values (2019–2021 mean)

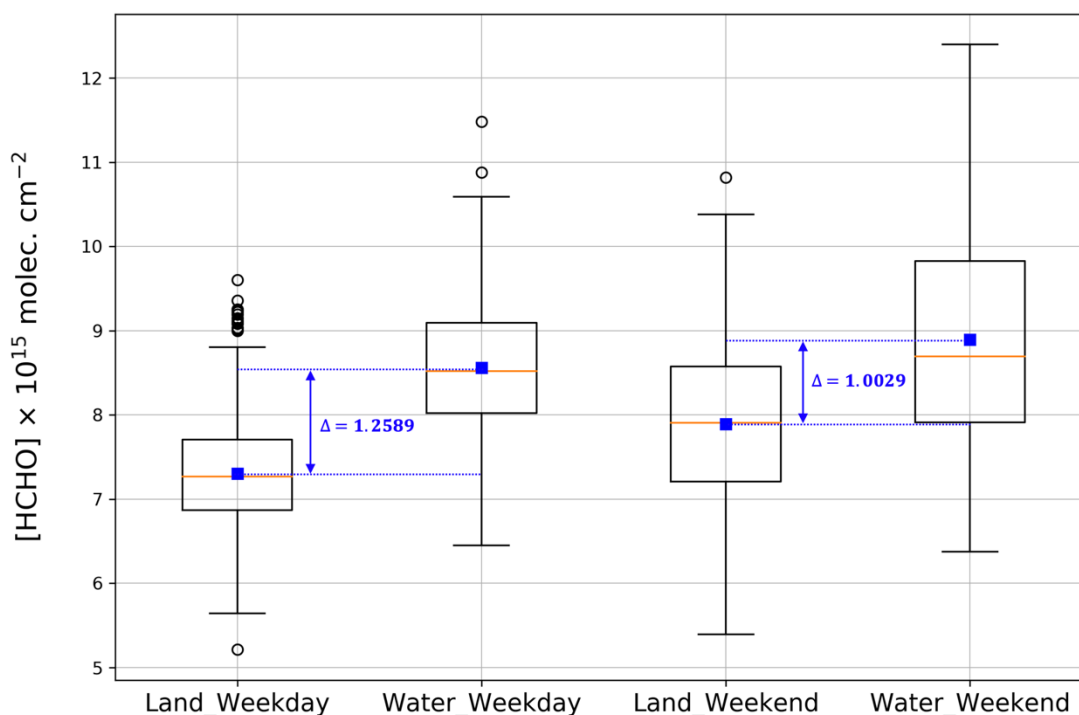

**Figure S9.** Boxplot distributions of TROPOMI HCHO VCDs for the weekday and weekend composites separated by over land and over water values. The median of each distribution is represented by an orange horizontal line, the mean is denoted by a blue square, and outliers are represented by circles outline in black. The difference in means between the over land and over water values ( $\Delta$ ) is the “absolute over water bias” value in **Table S8** below.

**Table S8.** HCHO absolute and relative over water bias values for the weekday and weekend composites. The absolute over water bias value is calculated by subtracting the mean HCHO over land value from the mean HCHO over water value. The relative over water bias value is calculated as  $\left(\frac{HCHO_{water\_mean} - HCHO_{land\_mean}}{HCHO_{land\_mean}}\right) \times 100\%$ .

| Composite category | Absolute over water bias                        | Relative over water bias |
|--------------------|-------------------------------------------------|--------------------------|
| Weekday            | $1.2589 \times 10^{15}$ molec. $\text{cm}^{-2}$ | +17.2 %                  |
| Weekend            | $1.0029 \times 10^{15}$ molec. $\text{cm}^{-2}$ | +12.7 %                  |

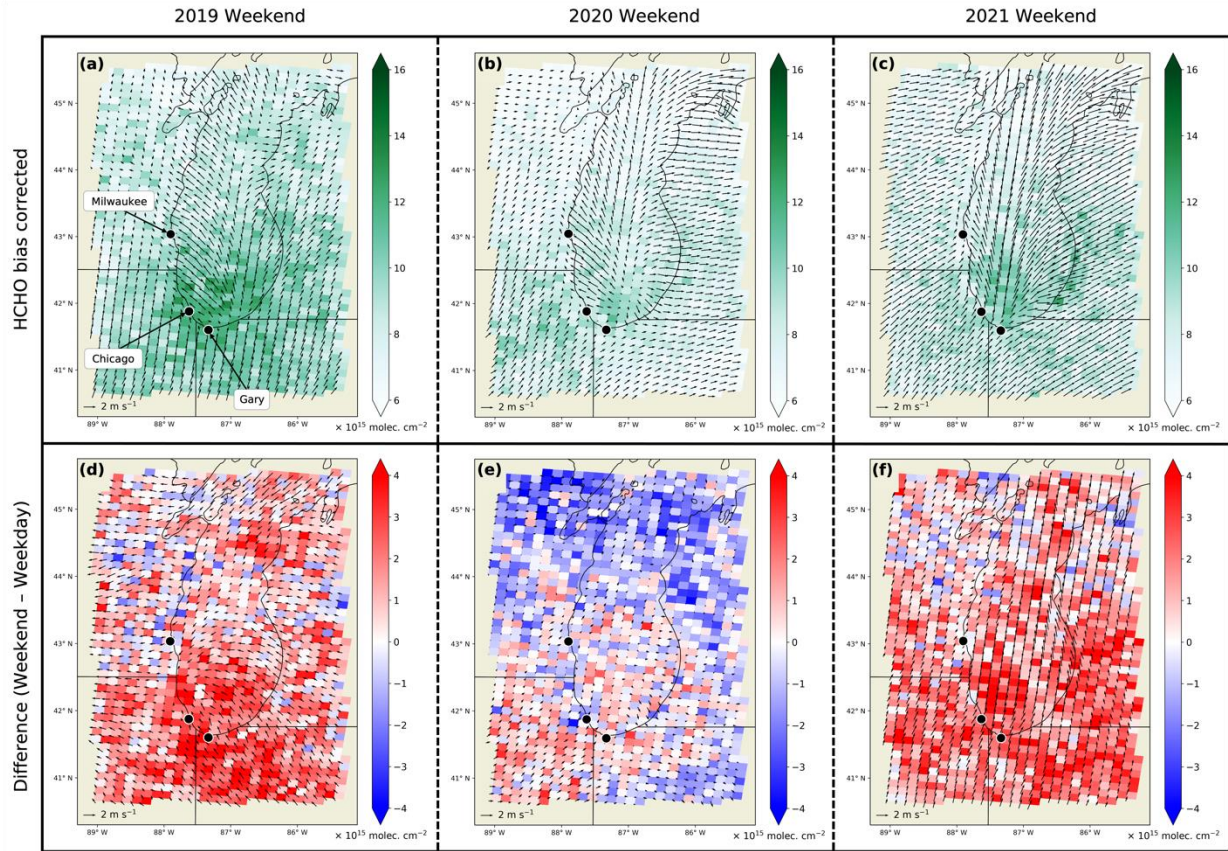

**Figure S10.** TROPOMI-derived composites of mean bias corrected weekend tropospheric HCHO VCDs in the Lake Michigan region during: (a) 2019, (b) 2020, and (c) 2021. The difference between bias corrected weekday and weekend tropospheric HCHO VCDs in the Lake Michigan region during: (d) 2019, (e) 2020, and (f) 2021. Mean 10-meter winds are represented by arrows.

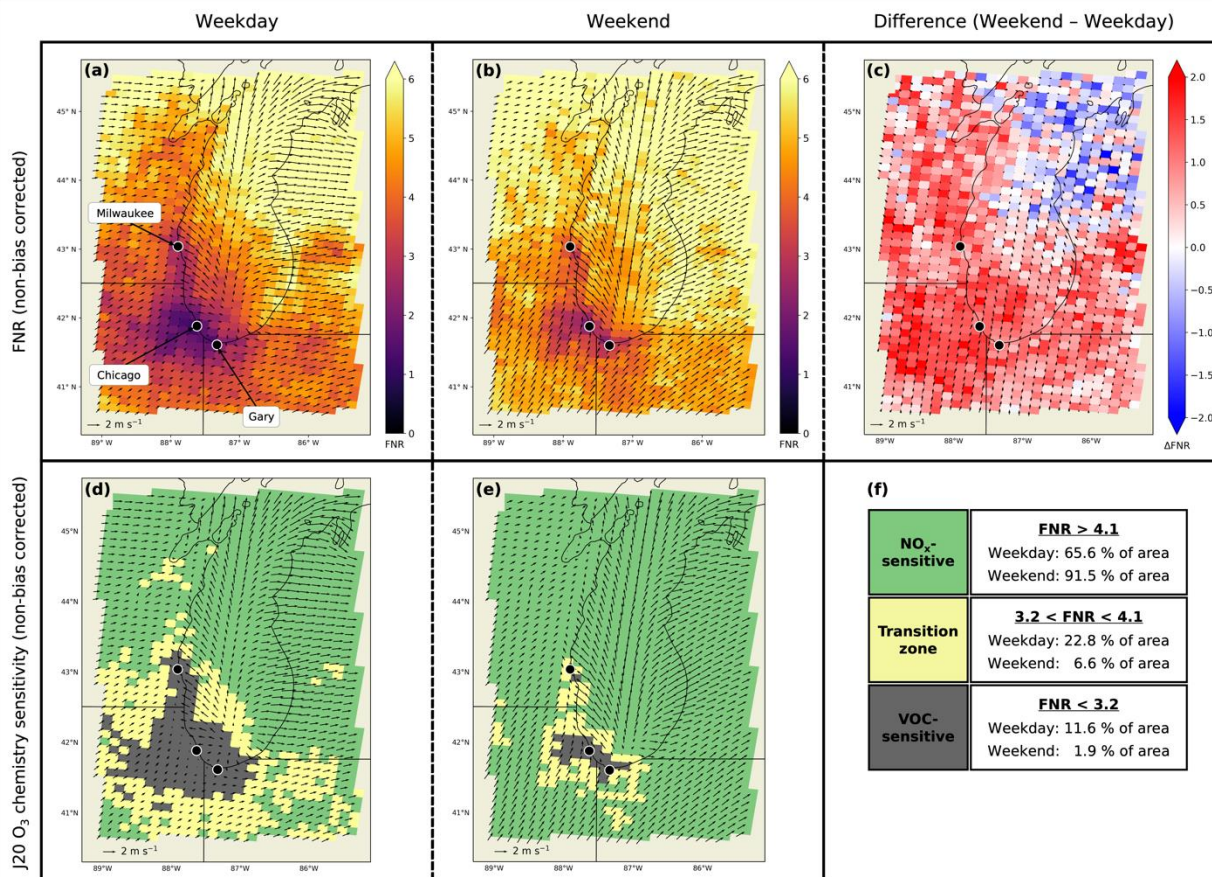

**Figure S11.** TROPOMI-derived 2019–2021 FNR values calculated using non-bias corrected HCHO values in the Lake Michigan region during: (a) weekdays, (b) weekends, and (c) the difference between them (weekend – weekday). J20 threshold interpretation of 2019–2021 ozone chemistry sensitivity using non-bias corrected FNR values during: (d) weekdays, (e) weekends, and (f) the percent of the domain area classified as each J20 sensitivity regime. Mean 10-meter winds are represented by arrows.
